# Supplementary material for: The Effect of Number and Position of P=O/P=S Bridging Units on Cavitand Selectivity toward Methyl Ammonium Salts
Source: MDPI journal article supplement (doi:10.3390/molecules20034460), 2015-03-10
Supplement: s1 [file s1]

## Supplementary Materials

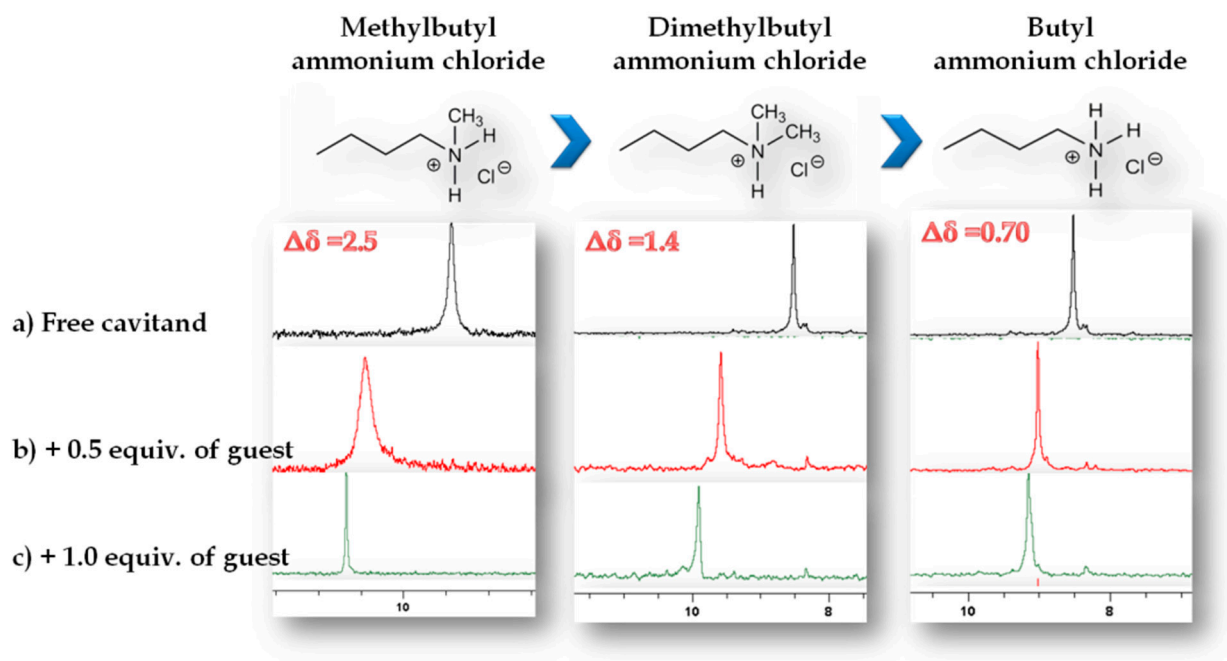

**Figure S1.**  $^{31}\text{P}$  NMR of  $\text{Ti}^{4+}[\text{C}_3\text{H}_7, \text{CH}_3, \text{Ph}]$ ·methylbutyl/dimethylbutyl/butyl ammonium chloride qualitative complexation test: (a) spectra of the free cavitand; (b) spectra recorded after the addition of 0.5 equivalents of the guest; (c) spectra recorded after the addition of 1.0 equivalent of the guest. All spectra were recorded in MeOD.

## ITC curves and fittings

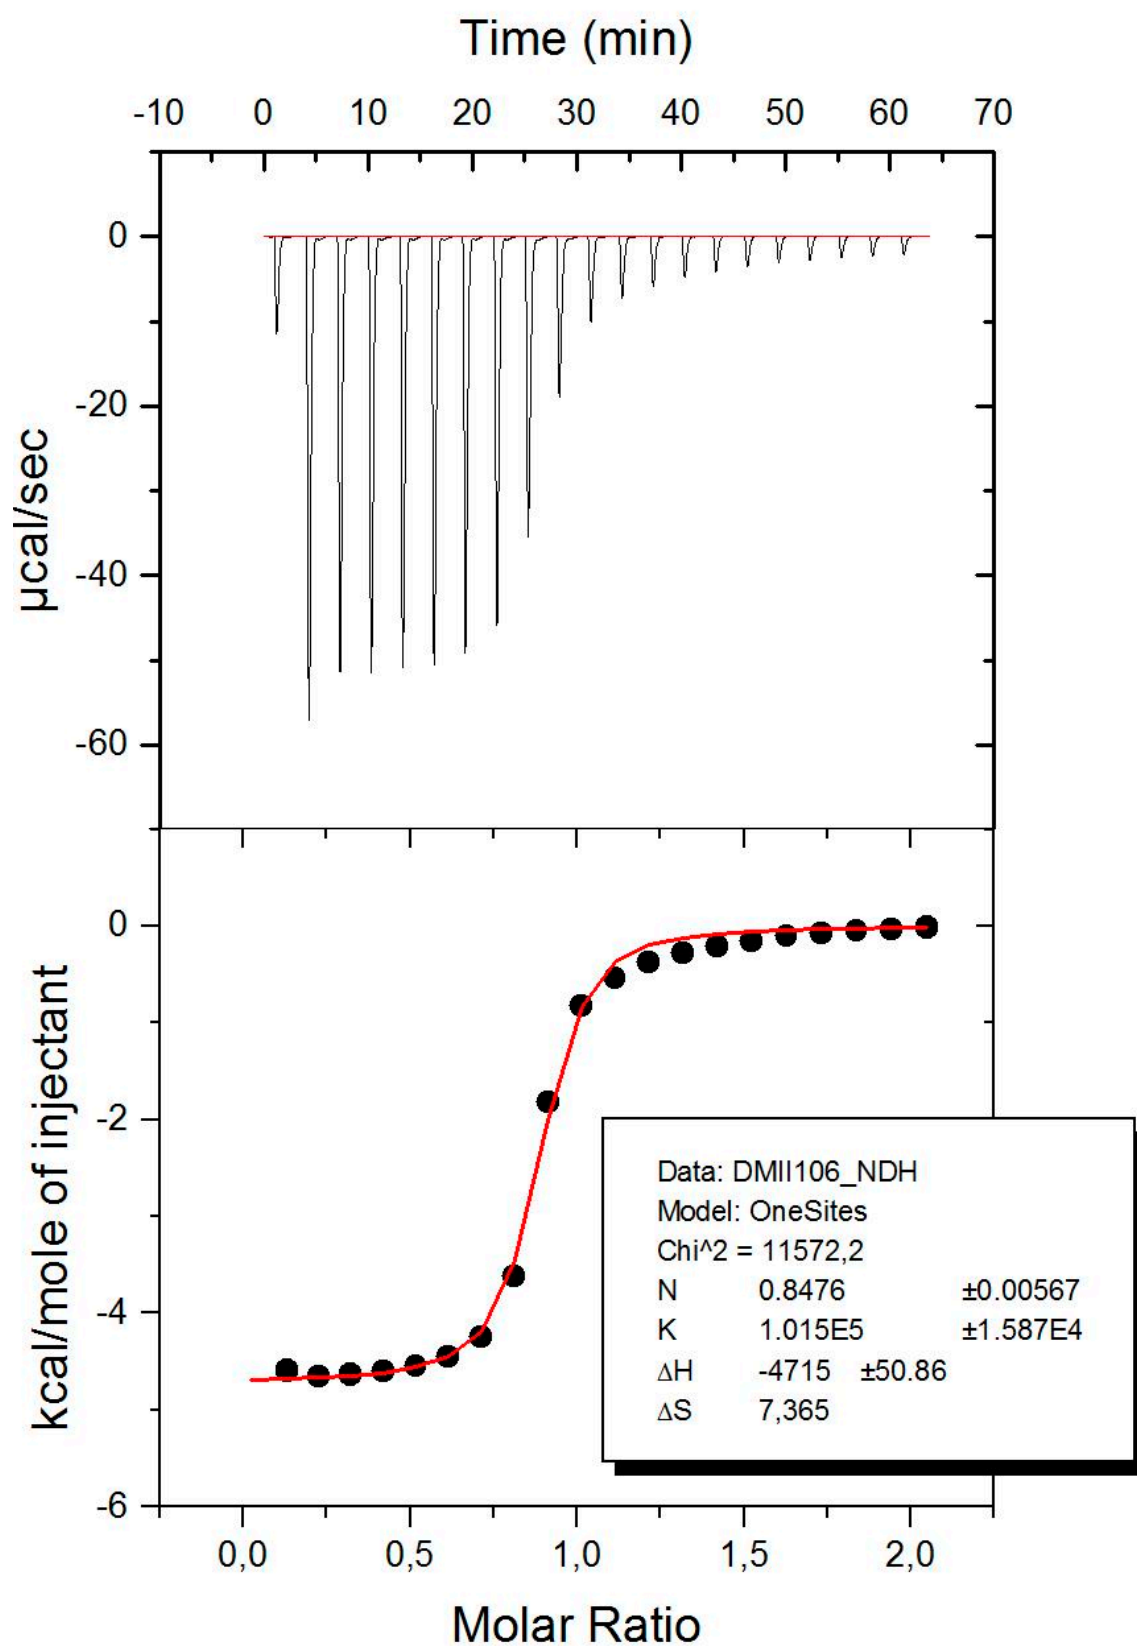**Figure S2.** ITC trace and fitting of 1@Tiini.

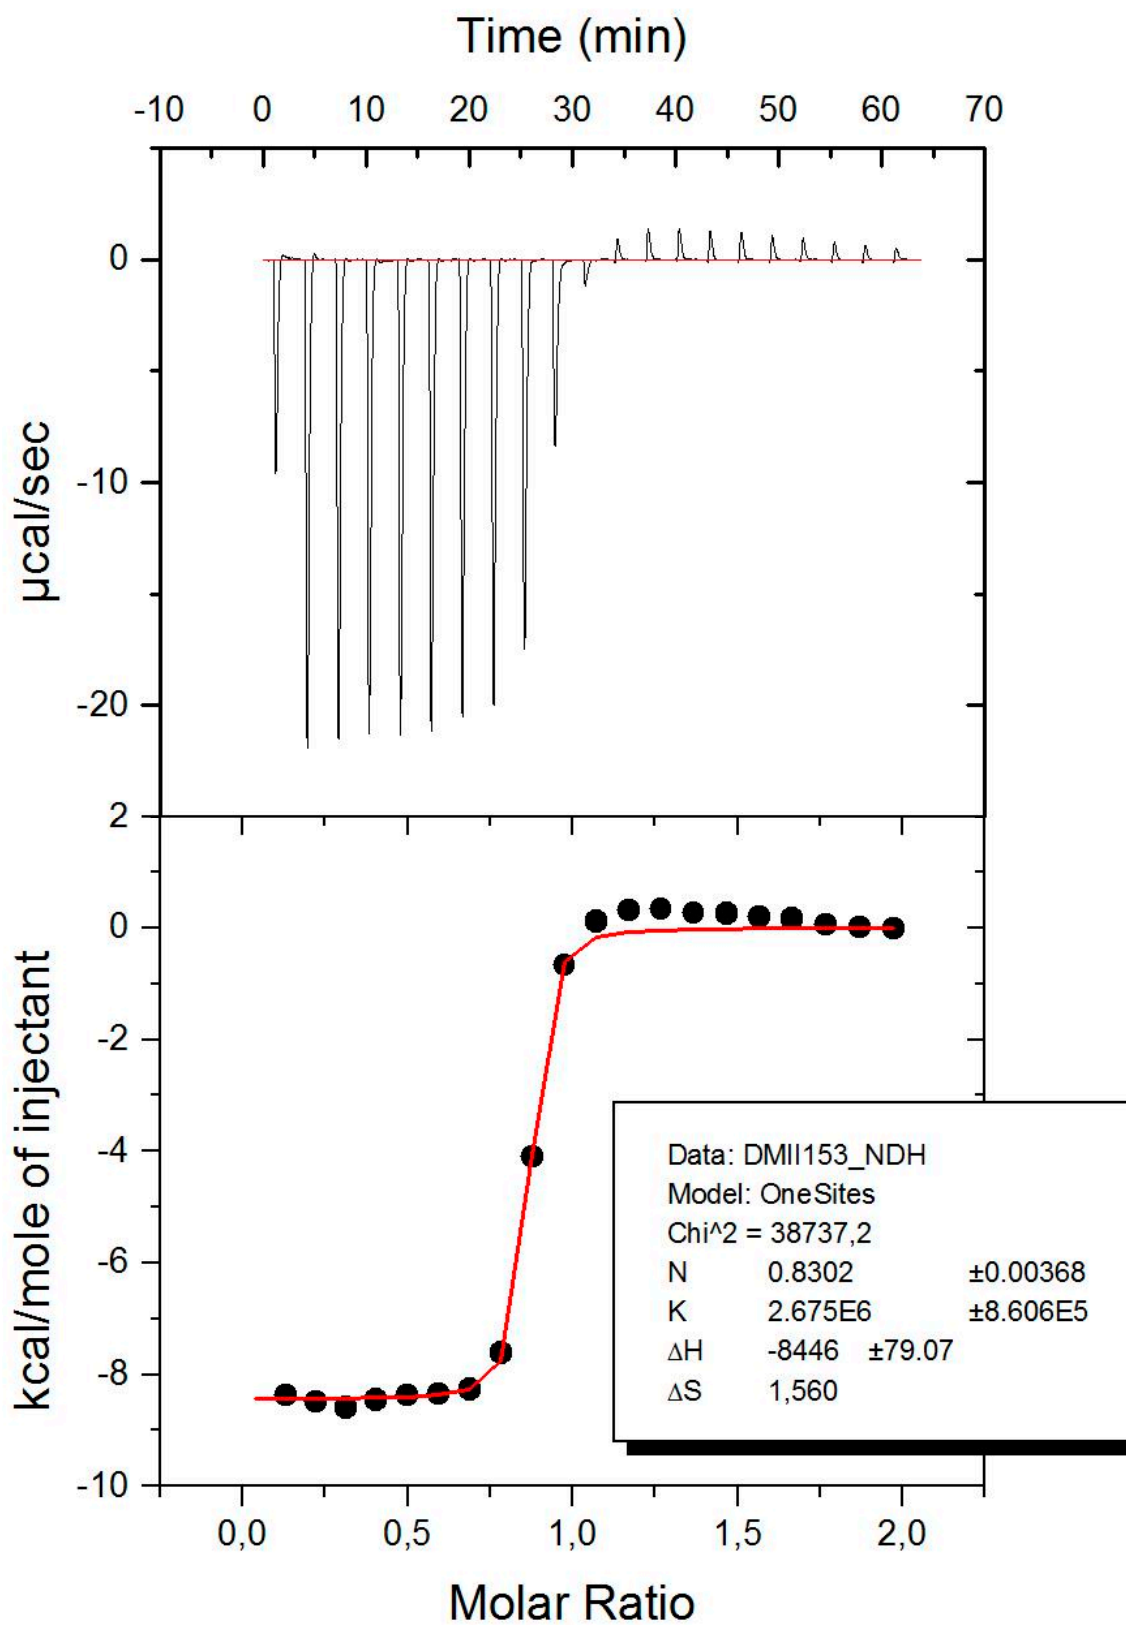

Figure S3. ITC trace and fitting of 1@3POiii1PSi.

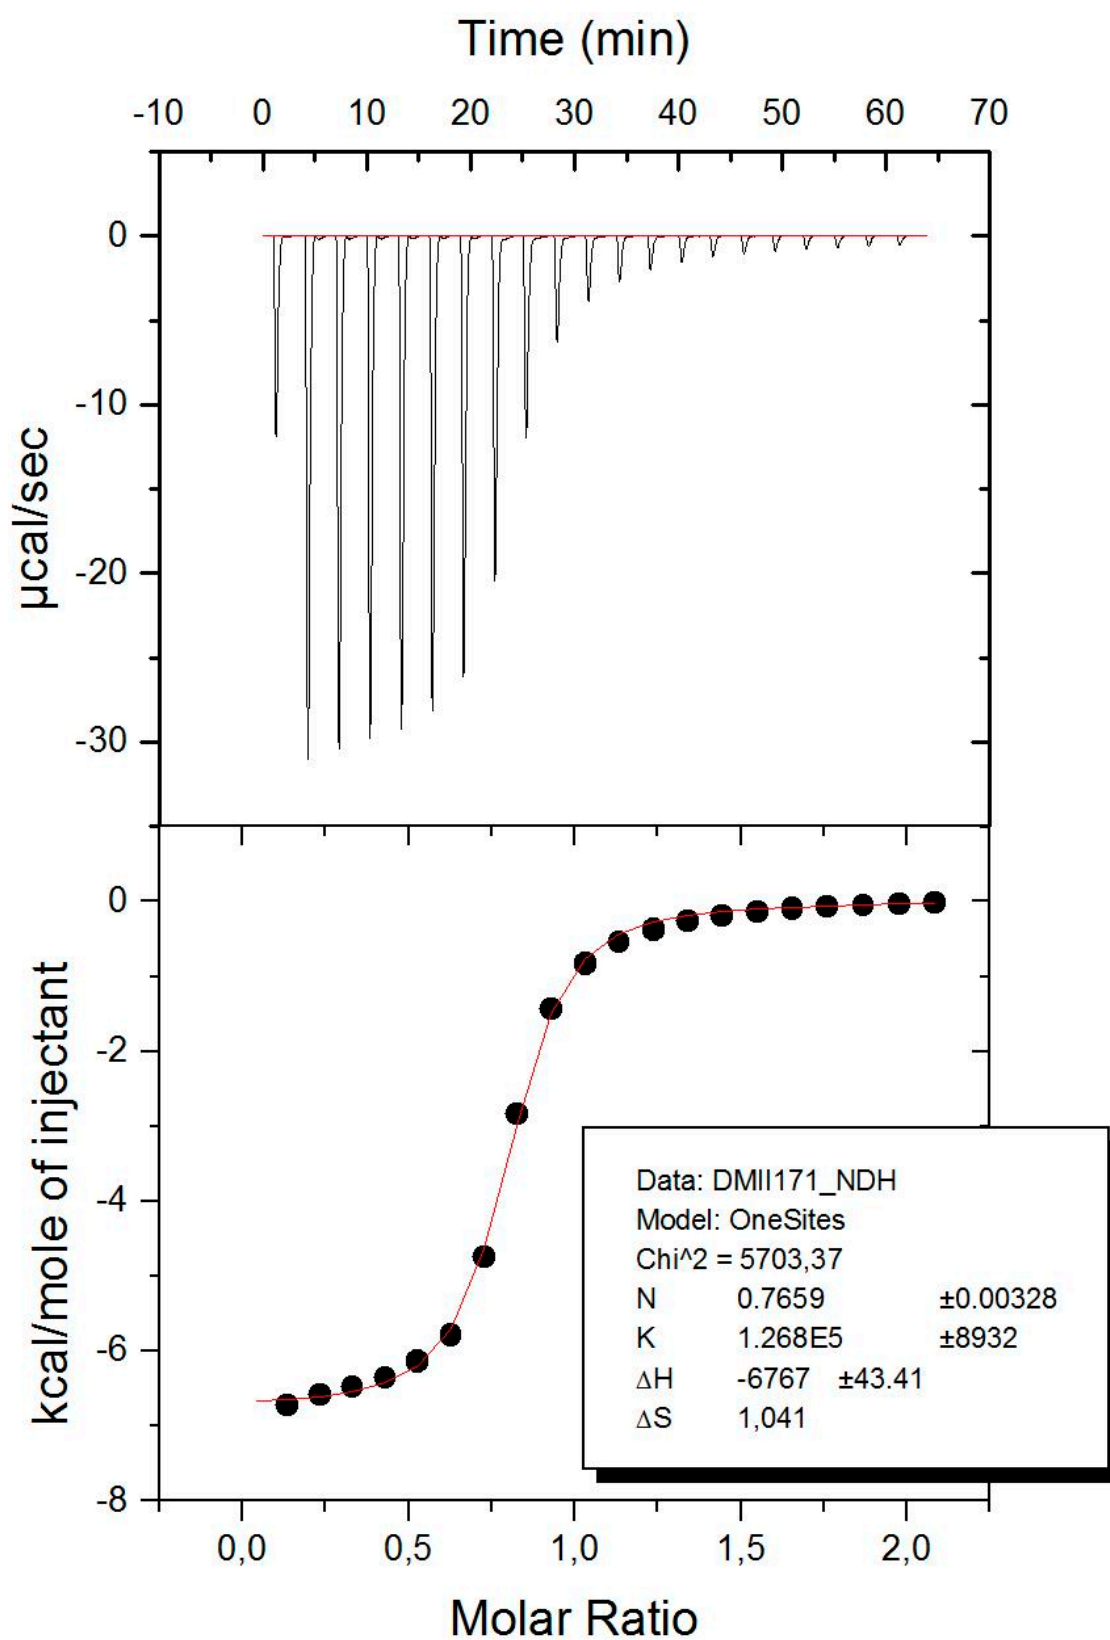

Figure S4. ITC trace and fitting of 1@AB2POii2PSii first run.

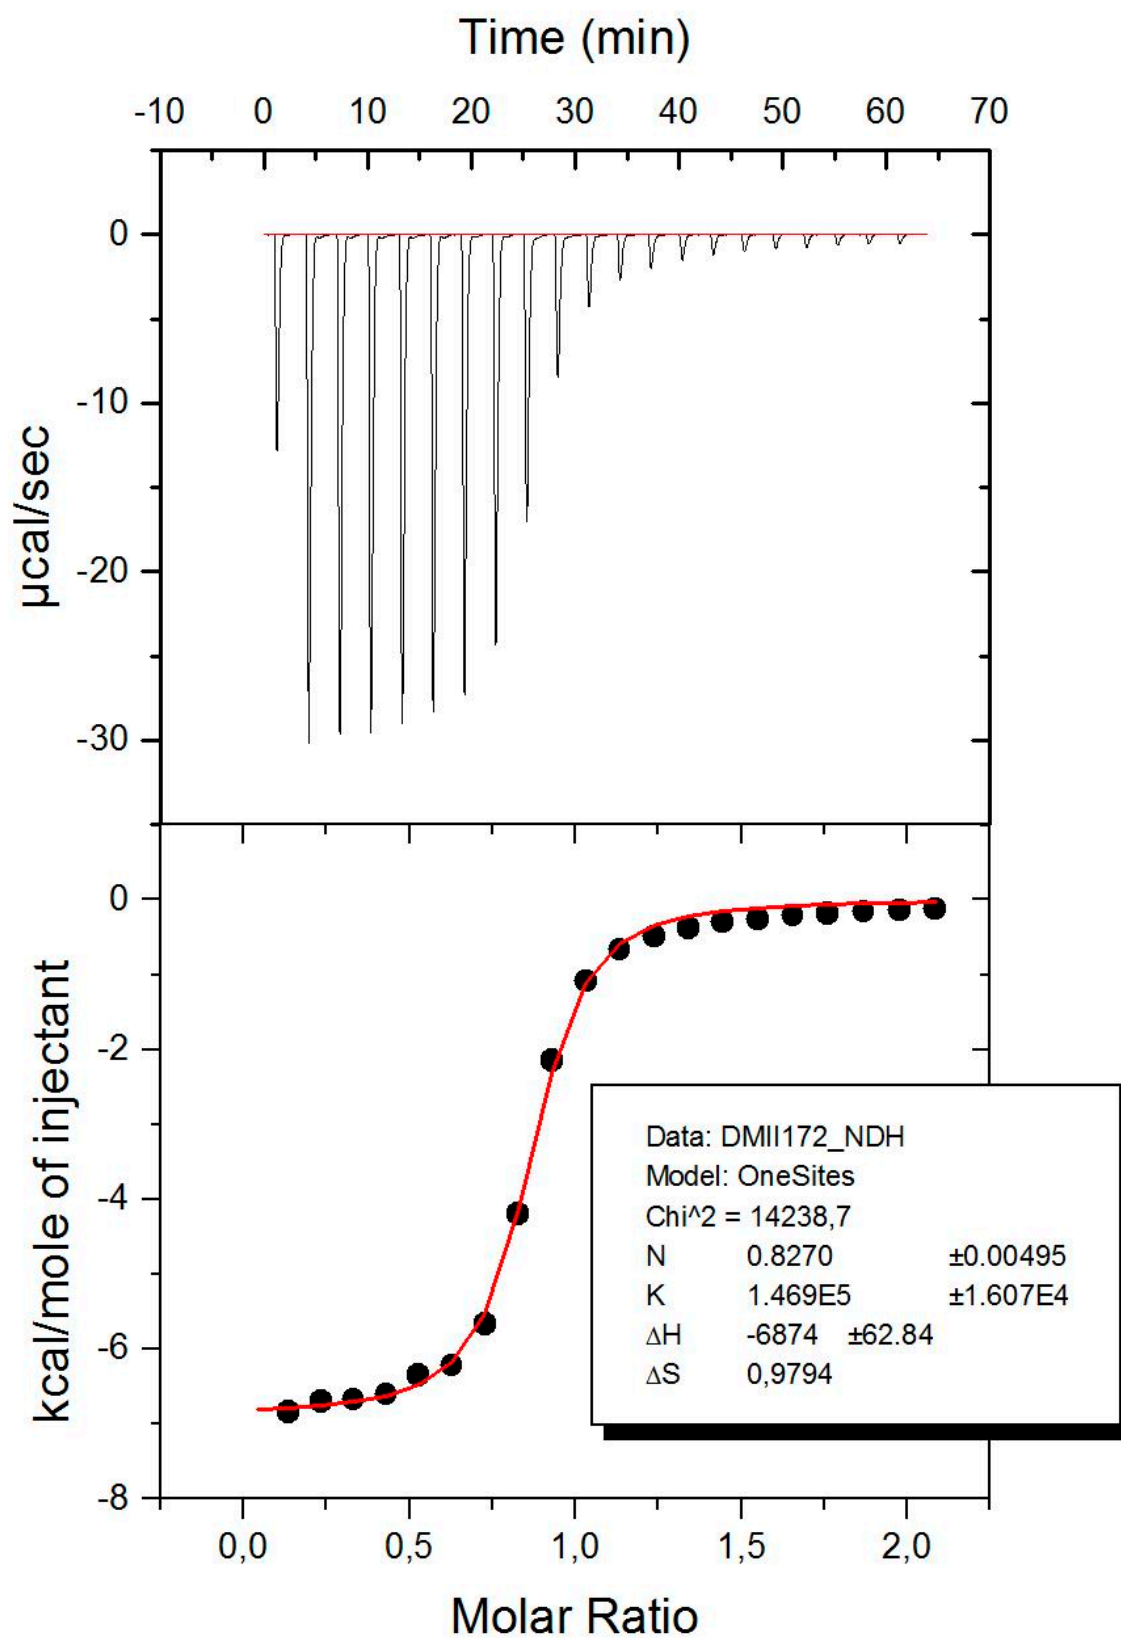

Figure S5. ITC trace and fitting of 1@AB2POii2PSii second run.

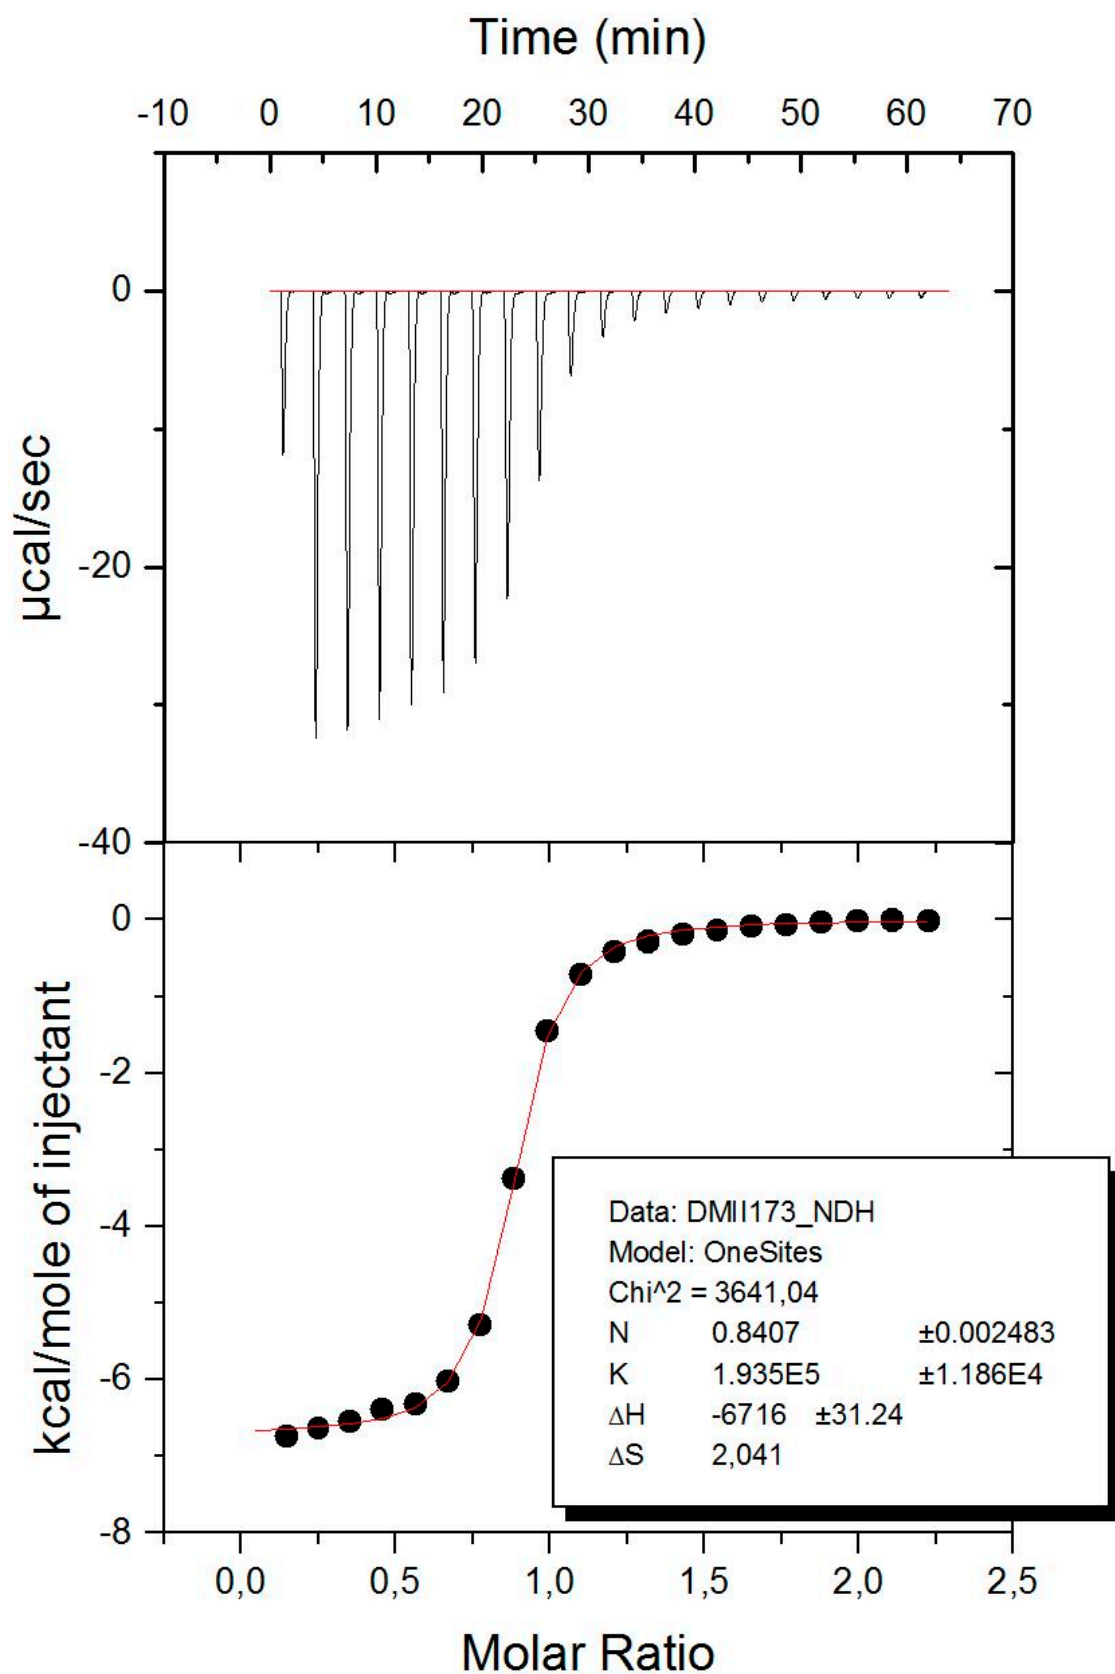

**Figure S6.** ITC trace and fitting of 1@AB2POii2PSii third run.

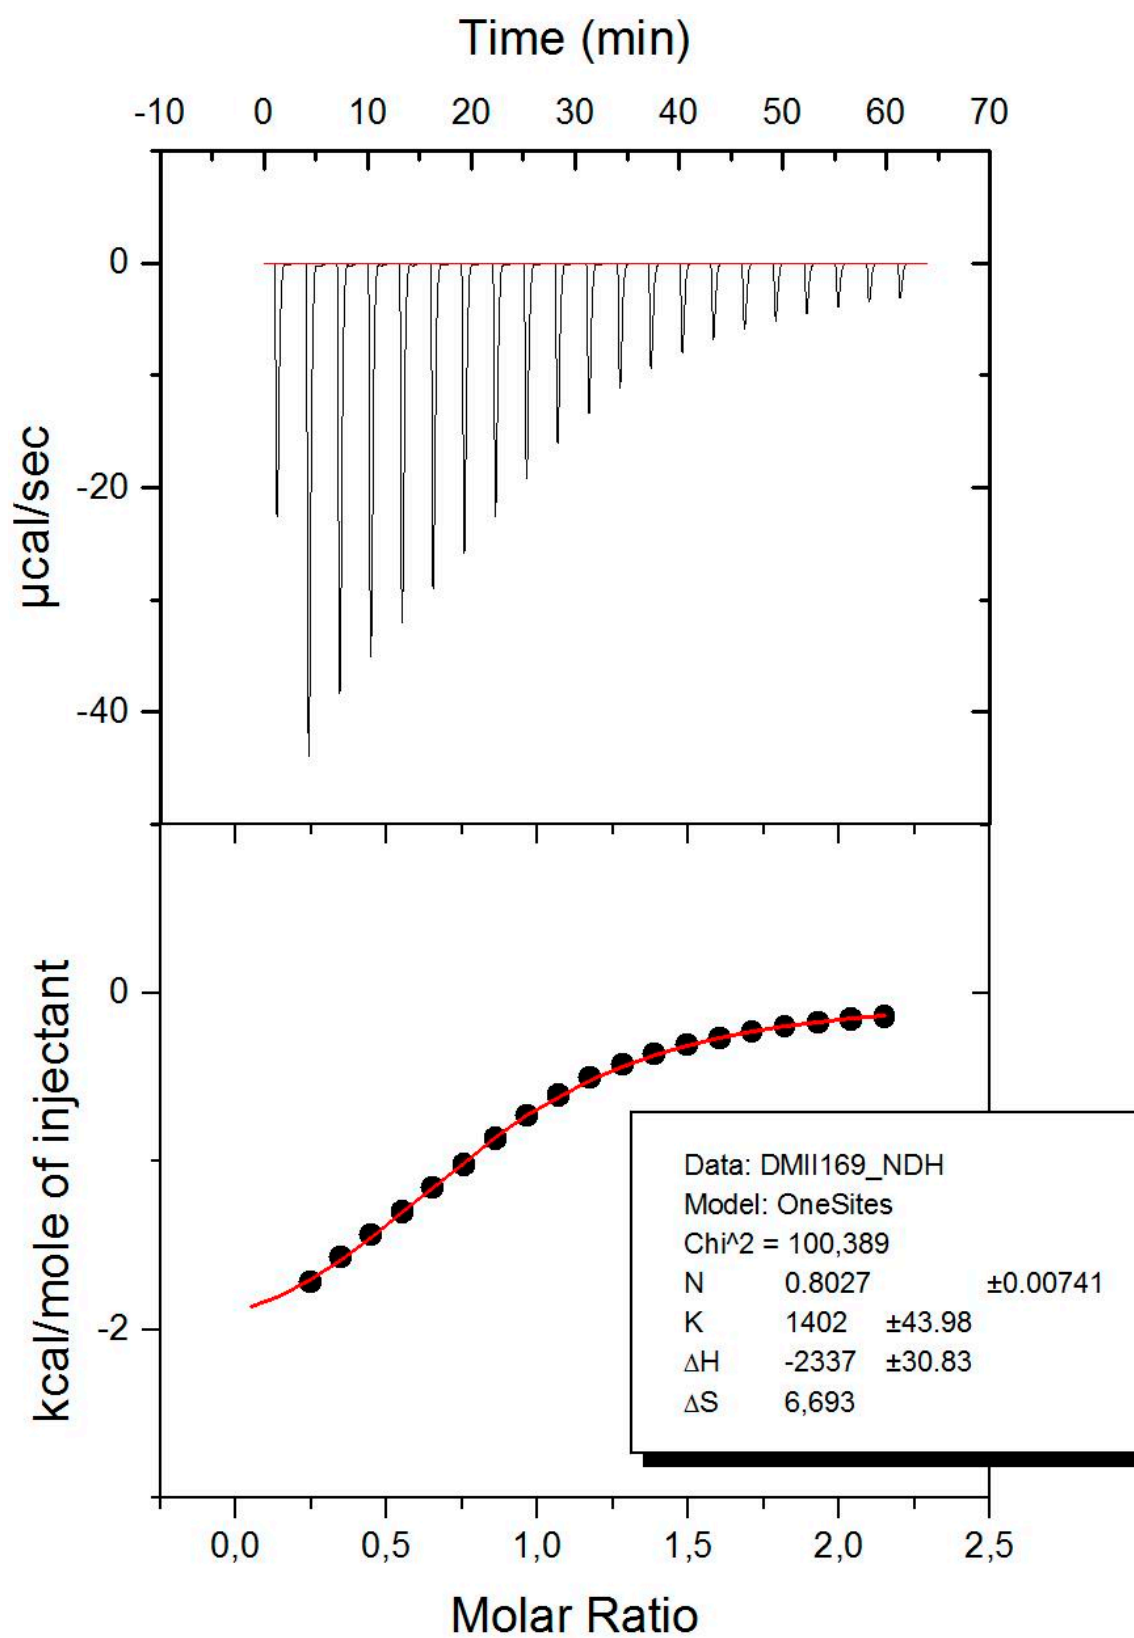

Figure S7. ITC trace and fitting of 1@AC2POii2PSii.

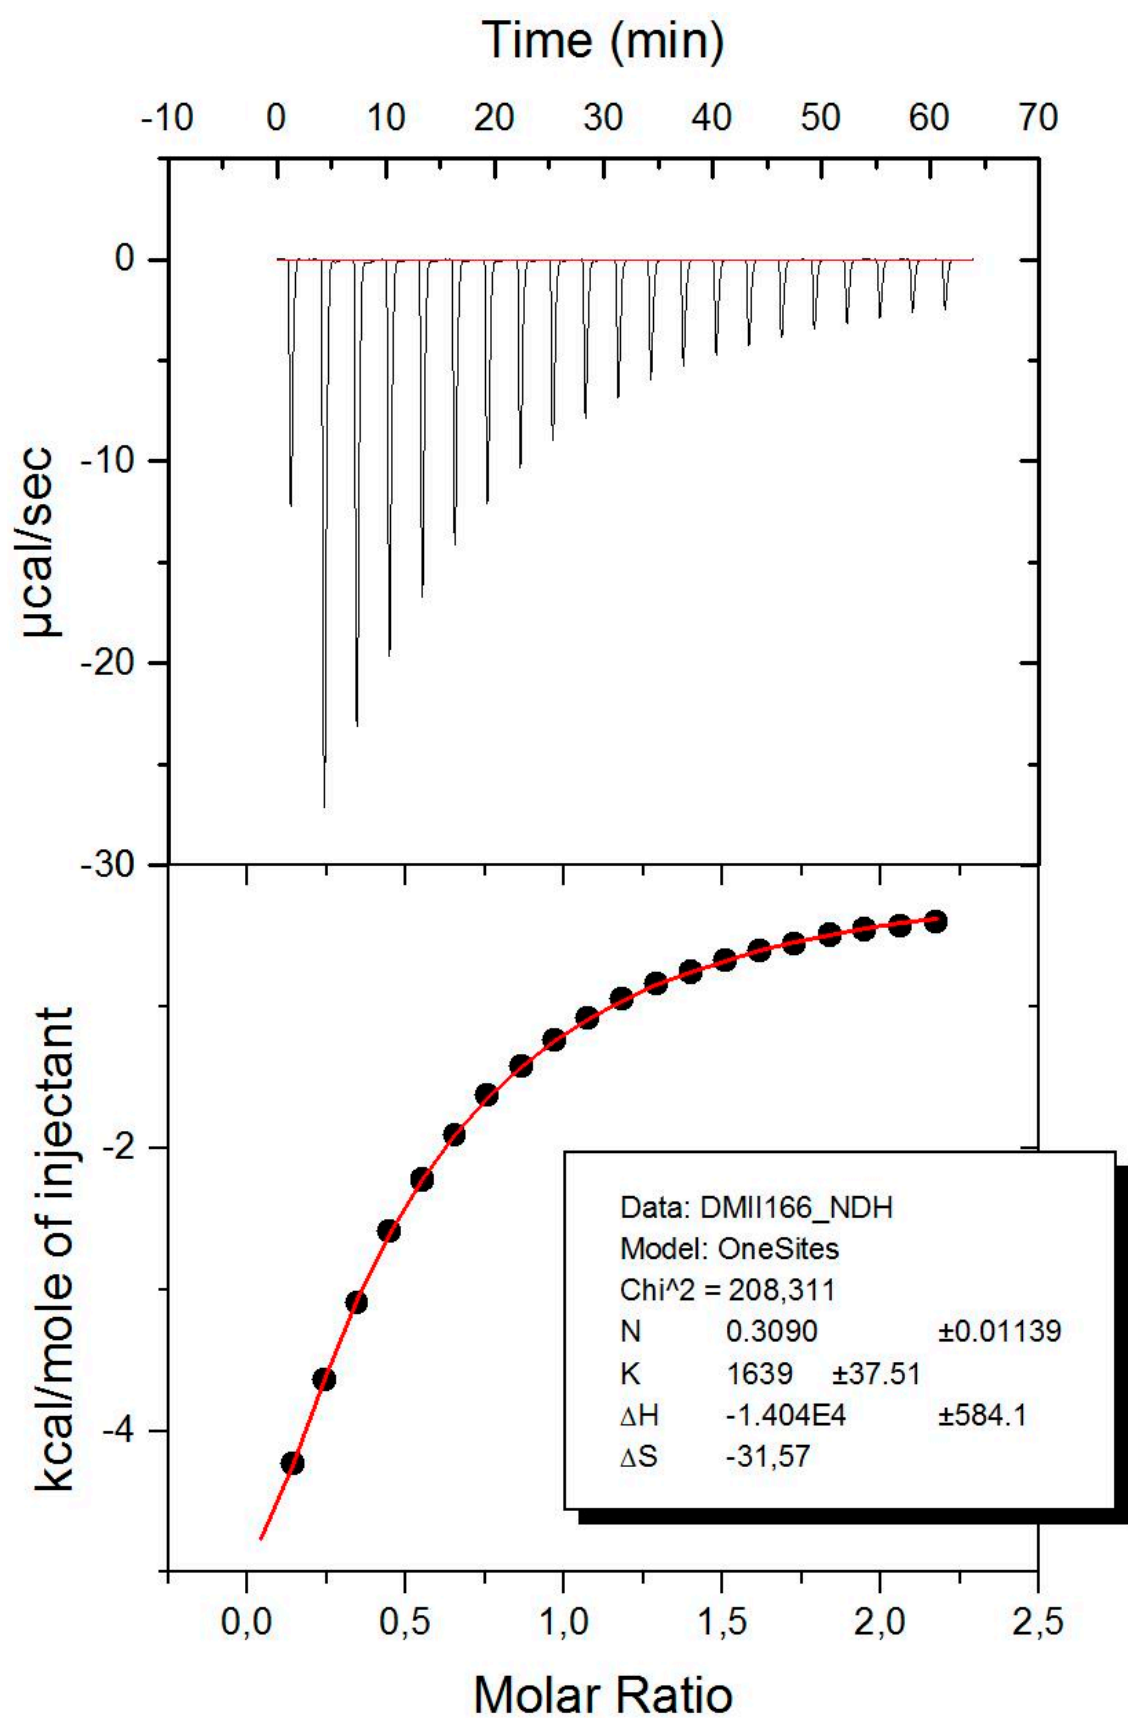

**Figure S8.** ITC trace and fitting of 1@1POi3PSiii.



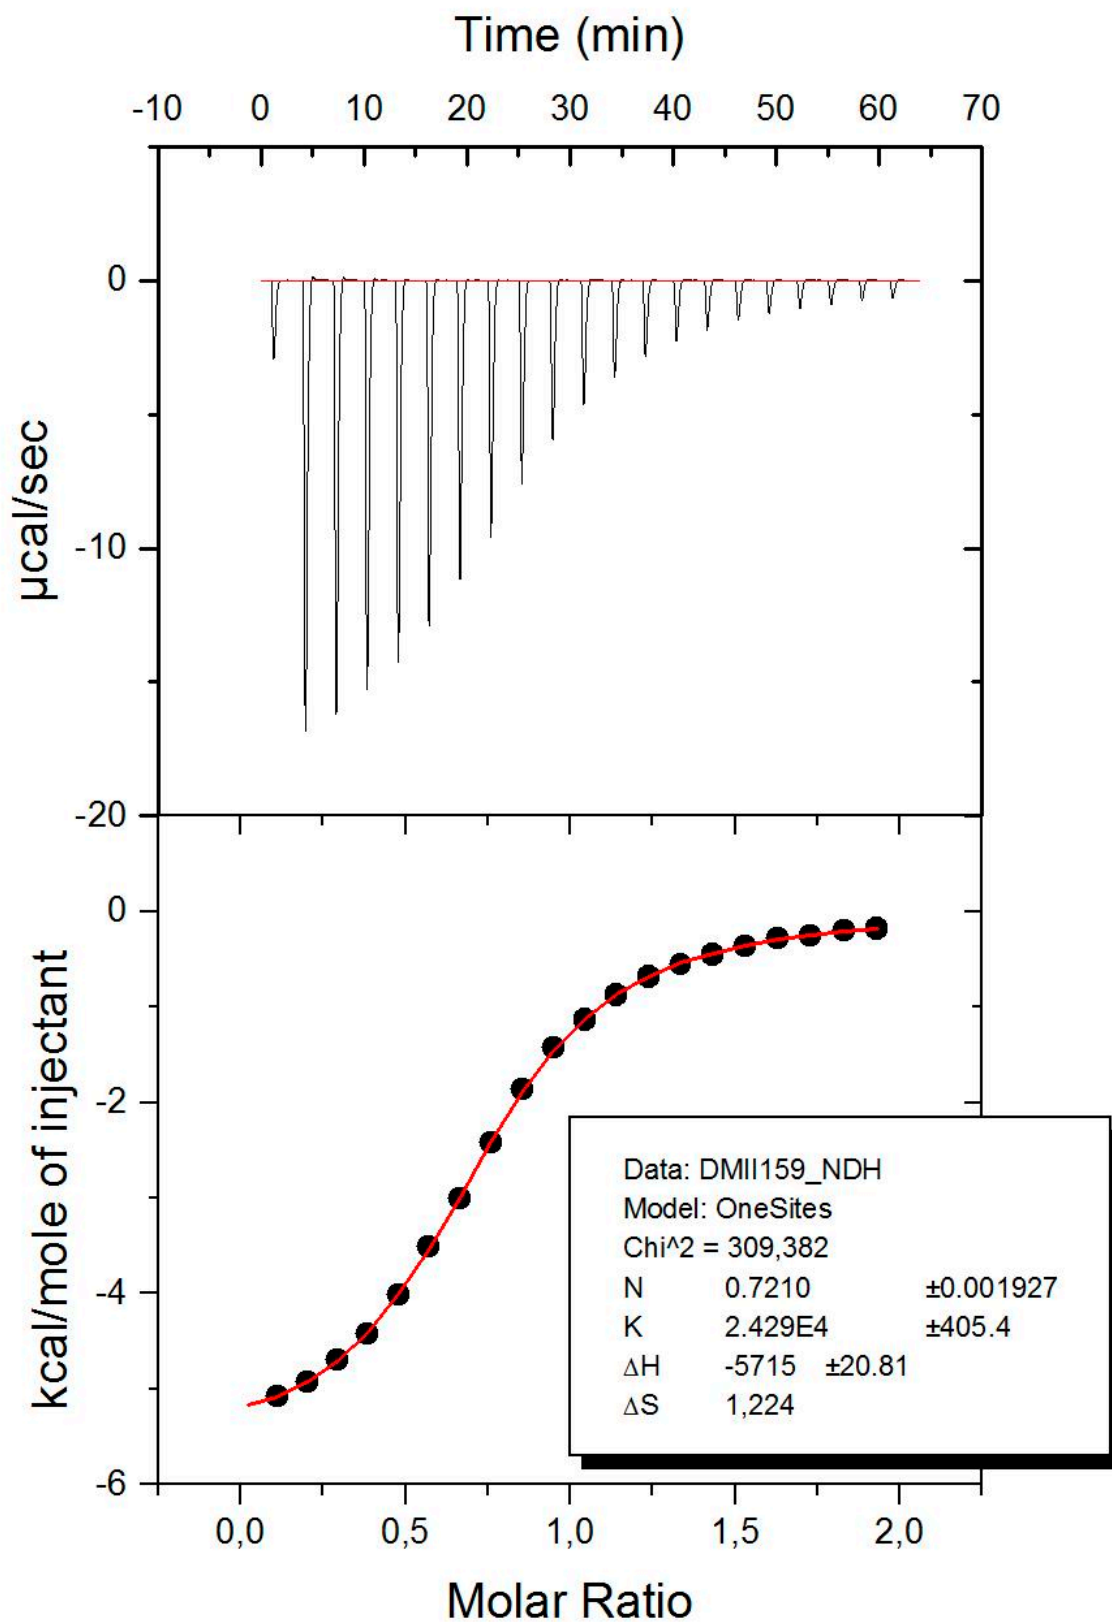

Figure S9. ITC trace and fitting of 1@3POiii1CH<sub>2</sub>.

**$^1\text{H}$  and  $^{31}\text{P}$ -NMR of the new cavitands**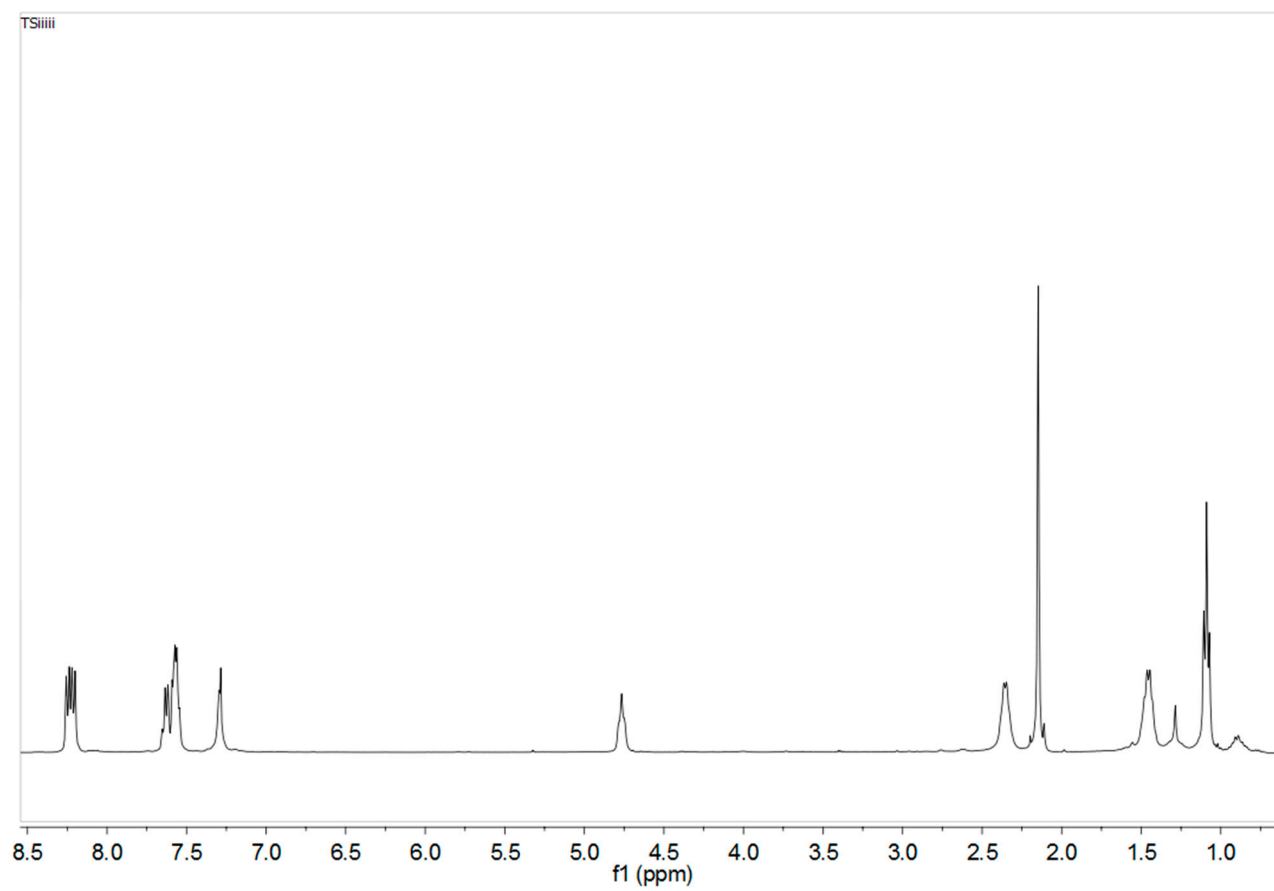**Figure S10.**  $^1\text{H}$ -NMR of TSiiii.

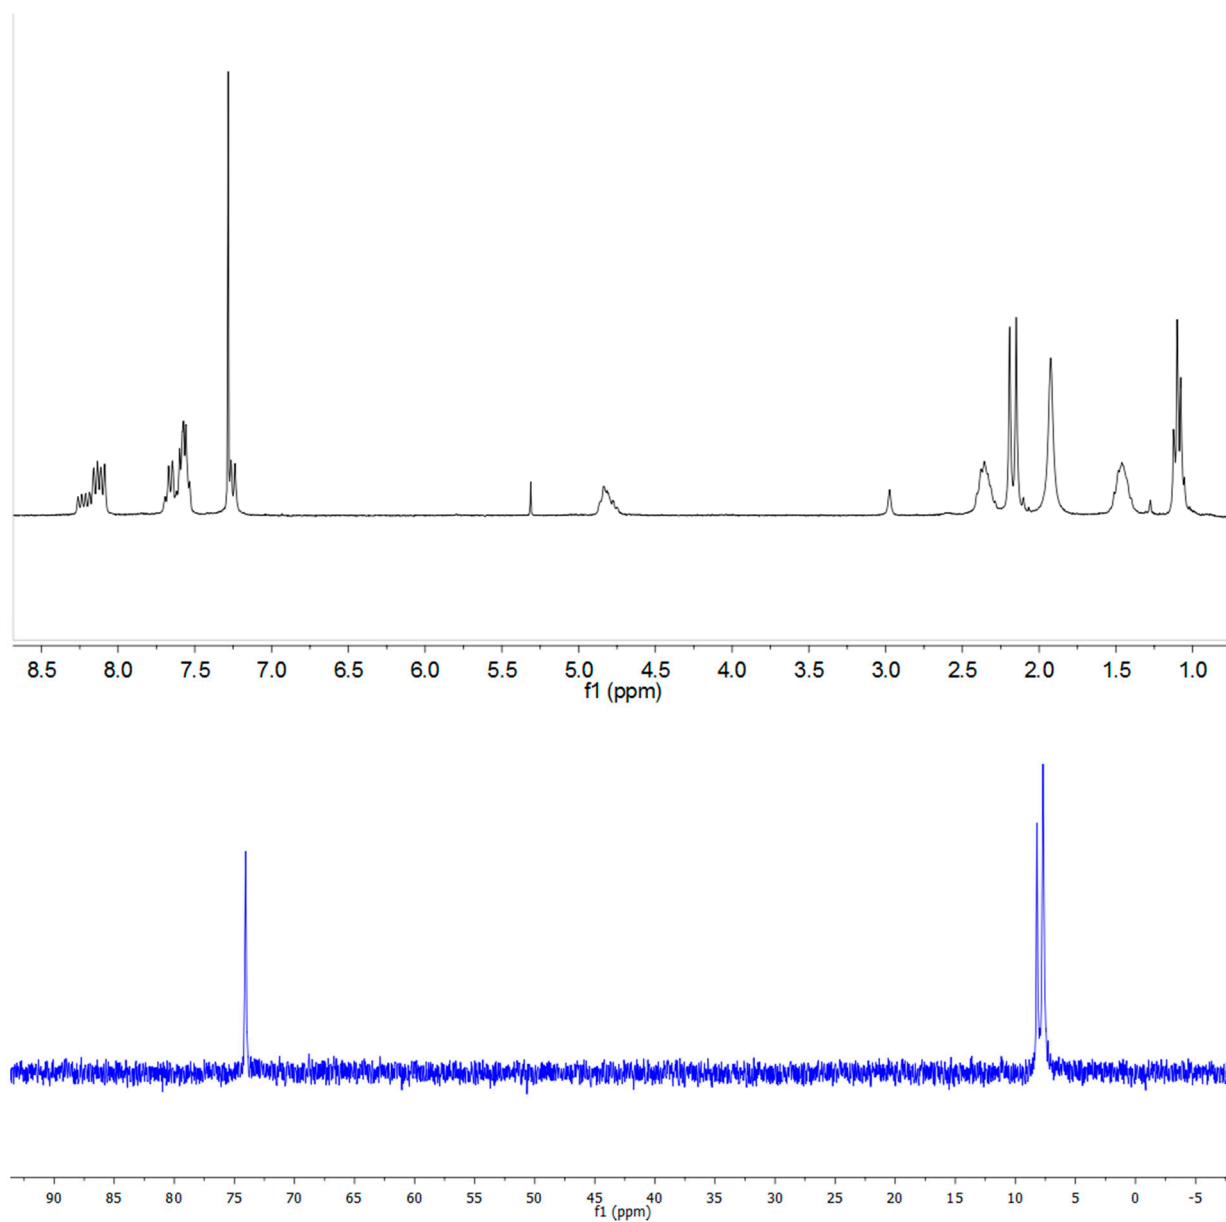

**Figure S11.**  $^1\text{H}$  and  $^{31}\text{P}$ -NMR of 3POiii1Psi.

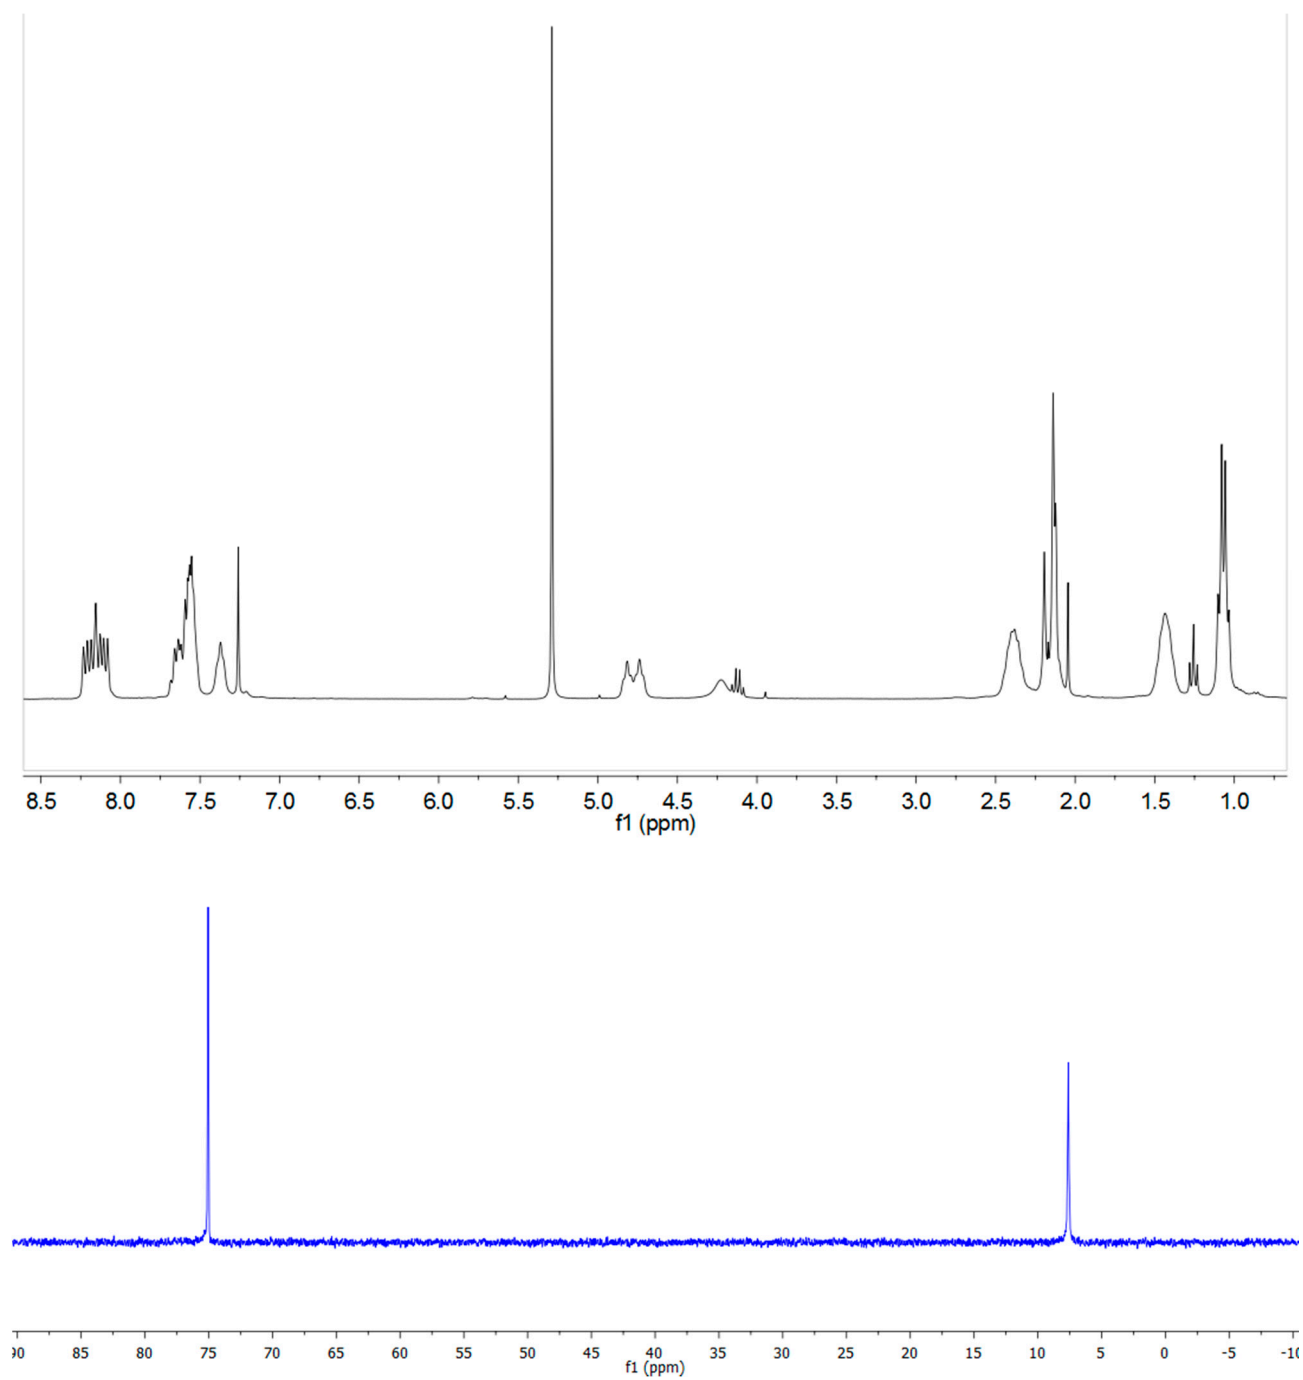

**Figure S12.** <sup>1</sup>H and <sup>31</sup>P-NMR of AB<sub>2</sub>POii<sub>2</sub>PSii.

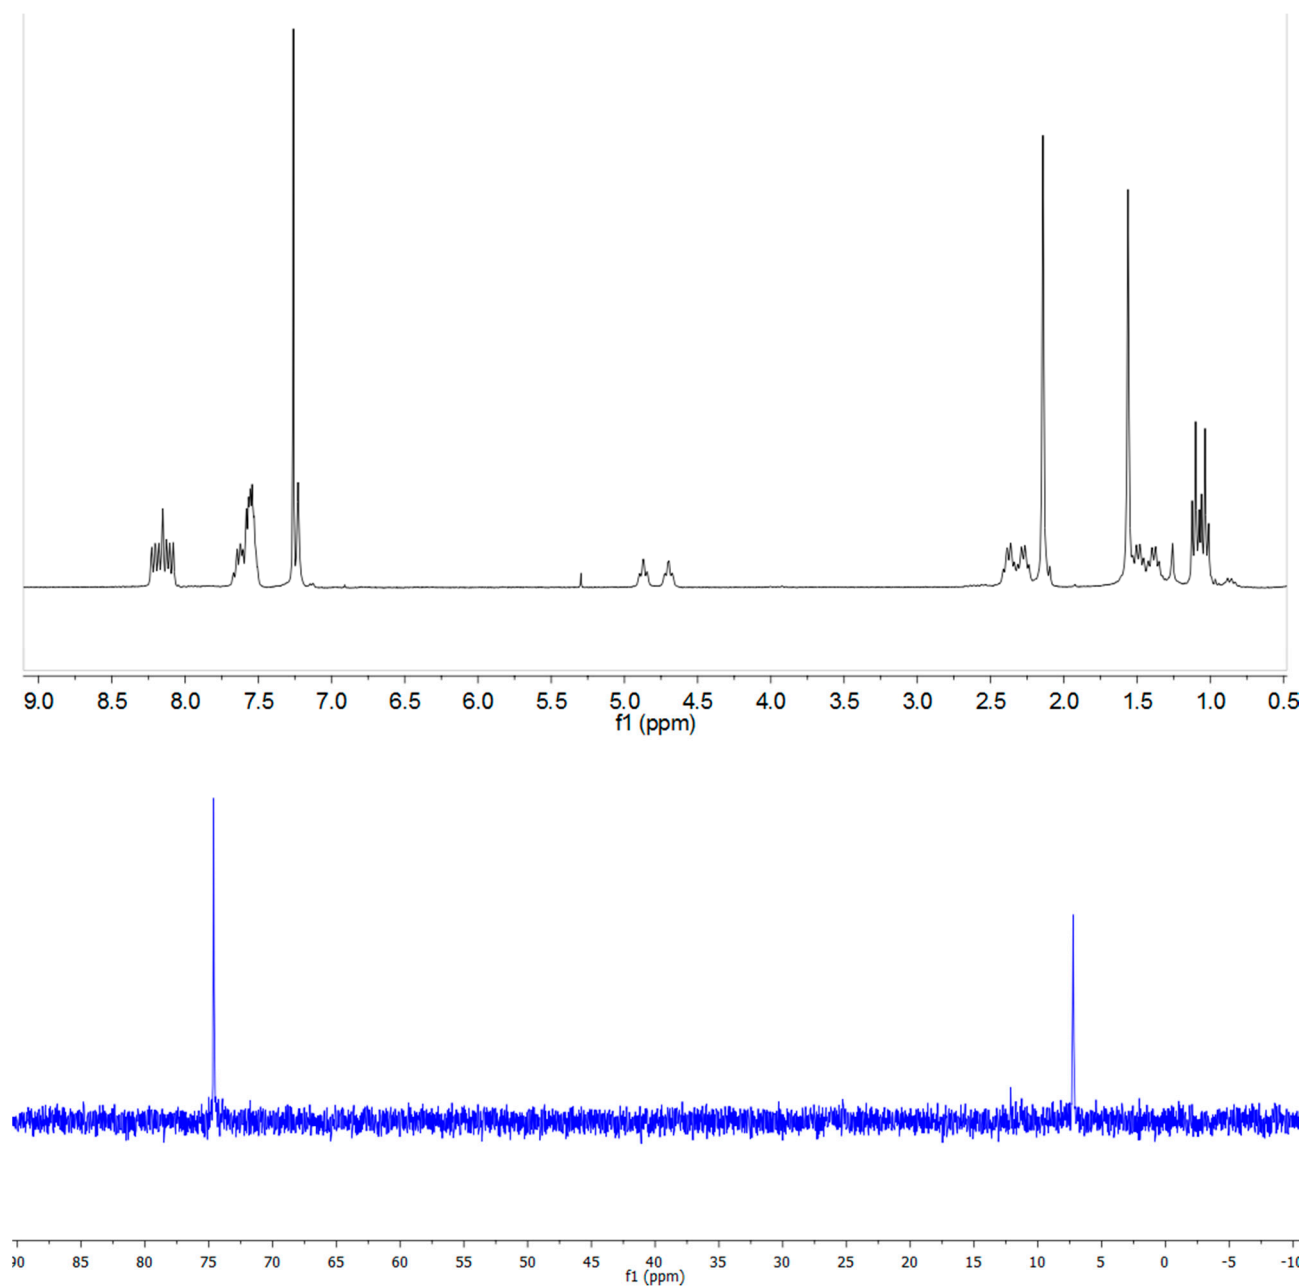

**Figure S13.**  $^1\text{H}$  and  $^{31}\text{P}$ -NMR of AC2POii2PSii.

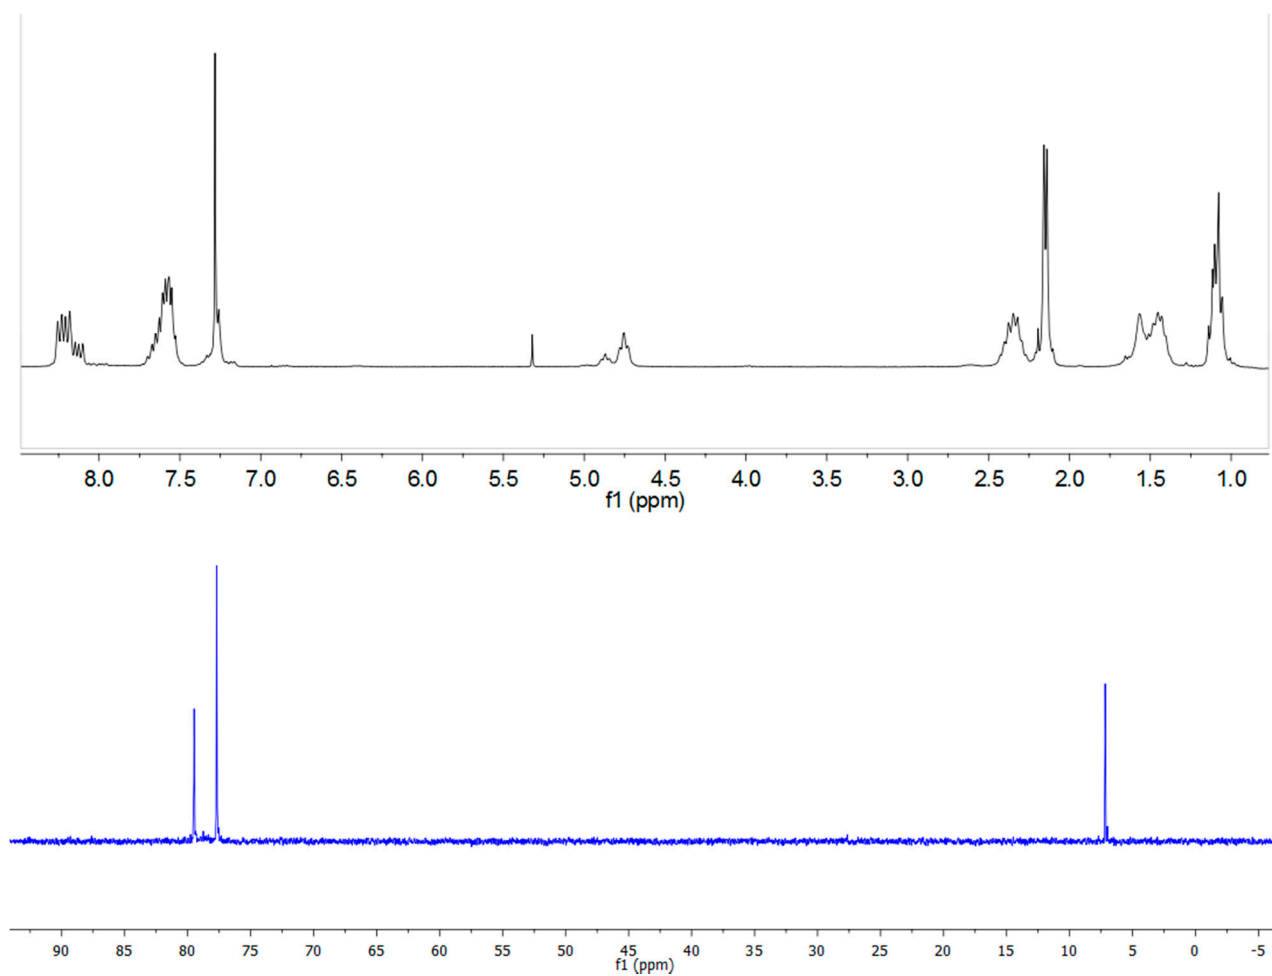

**Figure S14.**  $^1\text{H}$  and  $^{31}\text{P}$ -NMR of 1POi3PSiii.

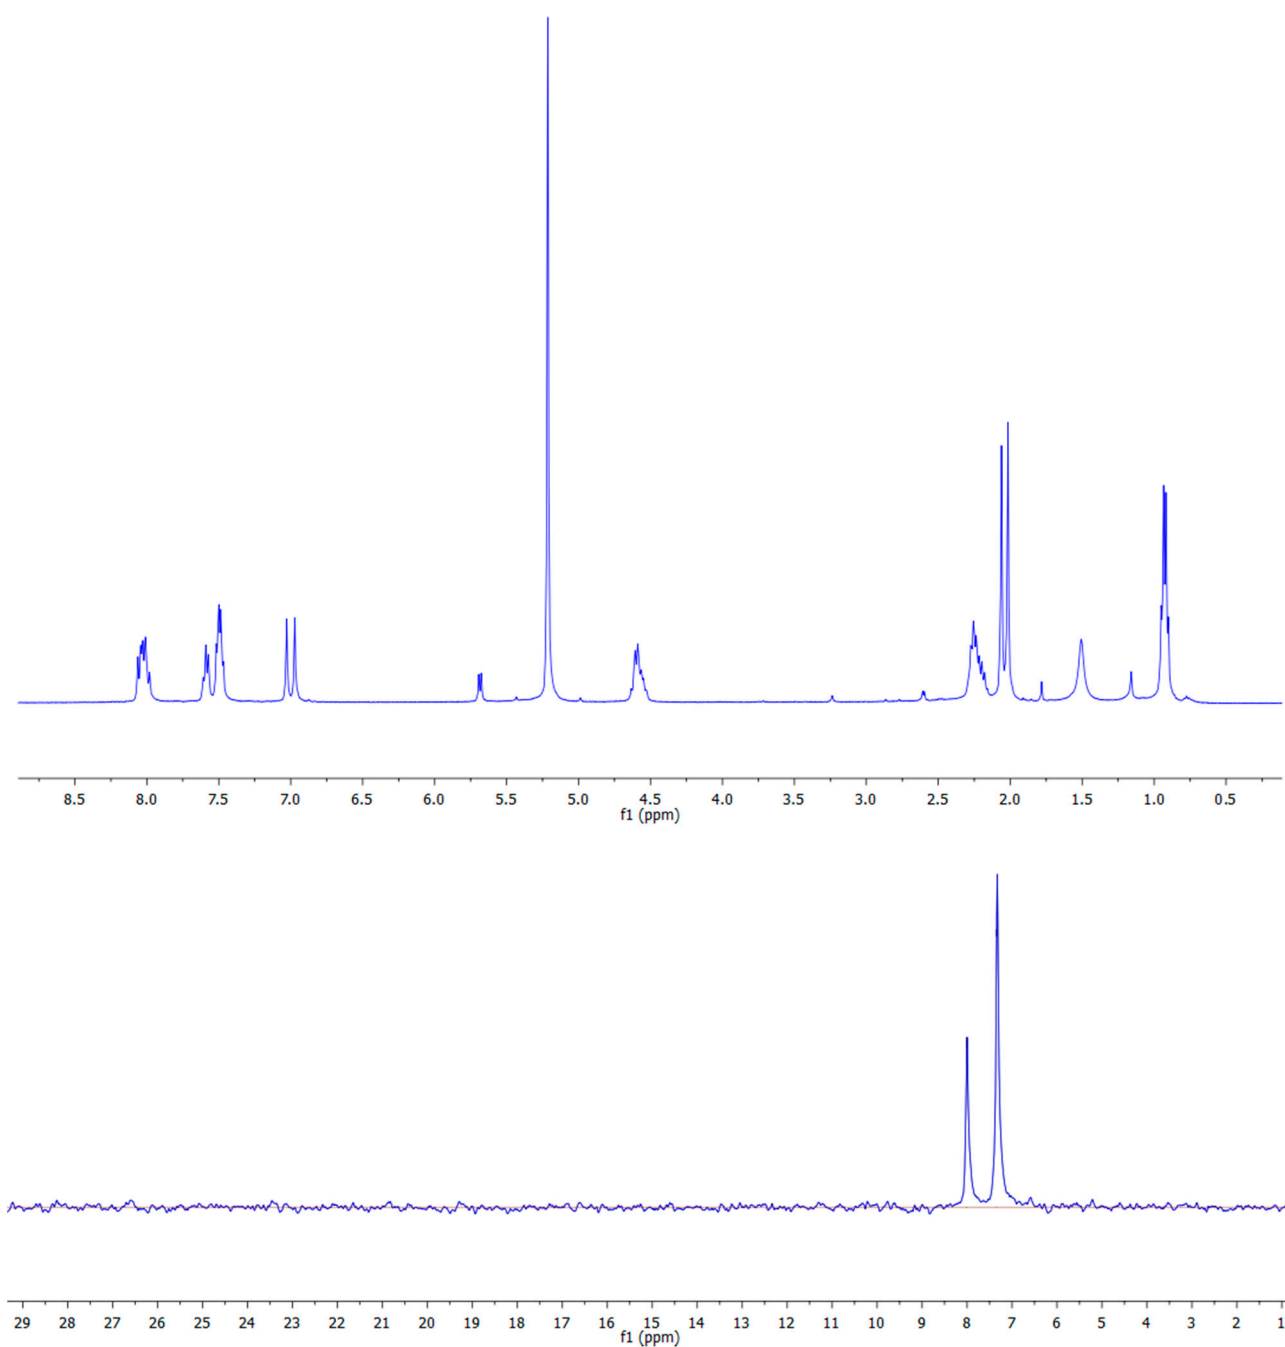

**Figure S15.** <sup>1</sup>H and <sup>31</sup>P-NMR of 3POiii1CH<sub>2</sub>.
